# Supplementary material
Source: publisher site journal article supplement (https://www.dovepress.com/article/476806)
Supplement: Supplementary file 1 [file get_supplementary_file.php]

**Supplementary Table S1.** Baseline characteristics of the participants lost to follow-up and study participants

| Variables | Total  (n=3089) | Study participants (n=2788) | Participants lost to follow-up (n=301) | Statistics | *P value* |
| --- | --- | --- | --- | --- | --- |
| Male*a* | 1285(41.60) | 1171(42.00) | 114(37.87) | 1.03 | 0.310 |
| Age (year)*a* |  |  |  | 0.15 | 0.878 |
| 60-69 | 1816(58.79) | 1633(58.57) | 183(60.80) |  |  |
| 70-79 | 947(30.66) | 877(31.46) | 70(23.26) |  |  |
| ≥80 | 326(10.55) | 278(9.97) | 48(15.95) |  |  |
| Baseline general information | | | | | |
| BMI (kg/m2)*a* |  |  |  | -1.25 | 0.212 |
| <18.5 | 150(4.86) | 119(4.27) | 31(10.30) |  |  |
| 18.5-23.9 | 1392(45.06) | 1270(45.55) | 122(40.53) |  |  |
| 24.0-27.9 | 1188(38.46) | 1074(38.52) | 114(37.87) |  |  |
| >27.9 | 359(11.62) | 325(11.66) | 34(11.30) |  |  |
| HDL (mmol/L)*b* | 1.54(1.30,1.83) | 1.54(1.30,1.83) | 1.58(1.31,1.85) | 1.16 | 0.246 |
| LDL (mmol/L)*b* | 3.01(2.45,3.60) | 3.01(2.44,3.60) | 3.04(2.60,3.64) | 1.05 | 0.294 |
| Cholesterol (mmol/L)*b* | 5.11(4.41,5.76) | 5.10(4.40,5.75) | 5.16(4.60,5.85) | 1.26 | 0.209 |
| Triglycerides (mmol/L)*b* | 1.40(1.07,1.90) | 1.40(1.09,1.90) | 1.37(1.02,1.90) | -0.51 | 0.614 |
| Disease history |  |  |  |  |  |
| Hypertension (Yes)*a* | 383(12.40) | 346(12.41) | 37(12.29) | 0.00 | 0.953 |
| Diabetes (Yes)*a* | 143(4.63) | 128(4.59) | 15(4.98) | 0.09 | 0.758 |
| Fatty liver*a* |  |  |  | 2.49 | 0.476 |
| No | 1531(49.56) | 1383(49.61) | 148(49.17) |  |  |
| Trendy | 631(20.43) | 560(20.09) | 71(23.59) |  |  |
| Mild | 341(11.04) | 311(11.15) | 30(9.97) |  |  |
| Moderate | 586(18.97) | 534(19.15) | 52(17.28) |  |  |
| Kidney stone (Yes)*a* | 130(4.21) | 124(4.45) | 6(1.99) | 4.06 | 0.044 |
| Baseline urine tests |  |  |  |  |  |
| Proteinuria (Yes)*a* | 181(5.86) | 164(5.88) | 17(5.65) | 0.03 | 0.869 |
| Urine pH*a* |  |  |  | 2.76 | 0.252 |
| <6 | 1716(55.55) | 1538(55.16) | 178(59.14) |  |  |
| 6-7 | 1319(42.70) | 1203(43.15) | 116(38.54) |  |  |
| >7 | 54(1.75) | 47(1.69) | 7(2.33) |  |  |
| eGFR (ml/min/1.73m2)*a* |  |  |  | 0.48 | 0.787 |
| <60 | 277(8.97) | 247(8.86) | 30(9.97) |  |  |
| 60-90 | 2084(67.47) | 1885(67.61) | 199(66.11) |  |  |
| >90 | 728(23.57) | 656(23.53) | 72(23.92) |  |  |
| Serum uric acid (μmol/L)*a* |  |  |  | 8.50 | 0.004 |
| <360 | 2289(74.10) | 2087(74.86) | 202(67.11) |  |  |
| ≥360 | 800(25.90) | 701(25.14) | 99(32.89) |  |  |

Abbreviations: eGFR, estimated glomerular filtration rate; BMI, body mass index; HDL, high-density lipoprotein; LDL, low-density lipoprotein.

*a*Categorical variables, expressed as n(%);

*b*Continuous variable, expressed as the median (IQR).

**Supplementary Table S2.** Univariate analysis of elevated blood uric acid at the one-year follow-up in the development cohort

| Variables | Total  (N=2287) | Elevated blood uric acid,n (%) | Statistics | *P value* |
| --- | --- | --- | --- | --- |
| Sex |  |  | 53.41 | <0.001 |
| Male | 925 | 109(11.78) |  |  |
| Female | 1362 | 52(3.82) |  |  |
| BMI (kg/m2) |  |  | 19.97 | <0.001 |
| <18.5 | 100 | 4(4.00) |  |  |
| 18.5-23.9 | 1024 | 50(4.88) |  |  |
| 24.0-27.9 | 895 | 76(8.49) |  |  |
| >27.9 | 268 | 31(11.57) |  |  |
| HDL (mmol/L) |  |  | 22.90 | <0.001 |
| <1.5 | 1035 | 102(9.86) |  |  |
| ≥1.5 | 1252 | 59(4.71) |  |  |
| Disease history |  |  |  |  |
| Hypertension |  |  | 5.27 | 0.022 |
| Yes | 281 | 29(10.32) |  |  |
| No | 2006 | 132(6.58) |  |  |
| Diabetes |  |  | 4.40 | 0.036 |
| Yes | 97 | 12(12.37) |  |  |
| No | 2190 | 149(6.80) |  |  |
| Fatty liver |  |  | 11.58 | 0.009 |
| No | 1165 | 68(5.84) |  |  |
| Trendy | 440 | 27(6.14) |  |  |
| Mild | 243 | 20(8.23) |  |  |
| Moderate | 439 | 46(10.48) |  |  |
| Baseline urine tests |  |  |  |  |
| Proteinuria |  |  | 22.13 | <0.001 |
| Yes | 126 | 22(17.46) |  |  |
| No | 2161 | 139(6.43) |  |  |
| eGFR (ml/min/1.73m2) |  |  | 51.83 | <0.001 |
| <60 | 200 | 38(19.00) |  |  |
| 60-90 | 1560 | 102(6.54) |  |  |
| >90 | 527 | 21(3.98) |  |  |
| Serum uric acid (μmol/L) |  |  | 207.31 | <0.001 |
| <360 | 1737 | 47(2.71) |  |  |
| ≥360 | 550 | 114(20.73) |  |  |

Abbreviations: eGFR, estimated glomerular filtration rate; BMI, body mass index; HDL, high-density lipoprotein.


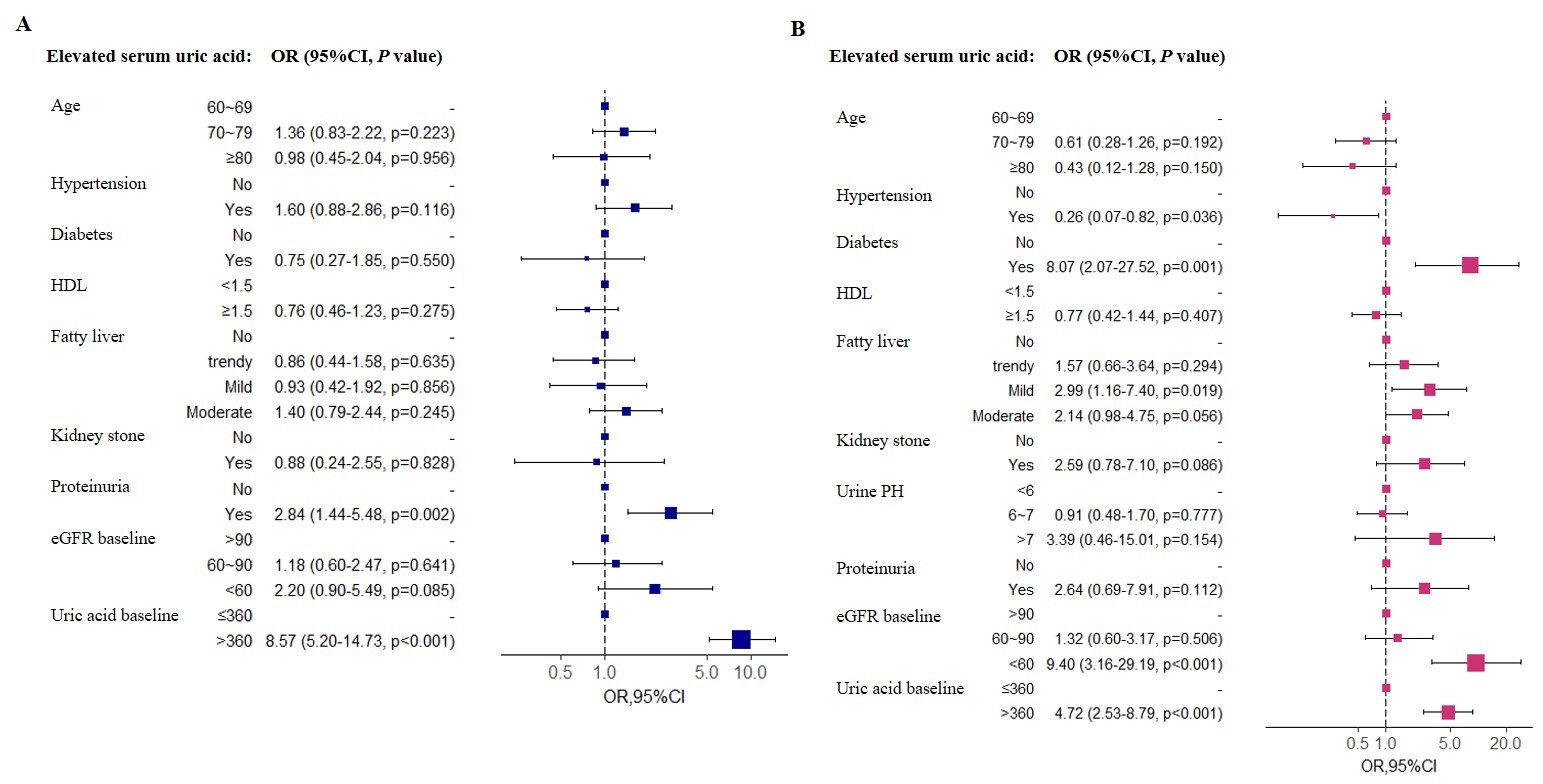


**Supplementary Figure 1A. Forest plot of the** **associations between various factors and elevated serum uric acid levels according to multivariate logistic regression analysis in the male cohort**

**Supplementary Figure 1B. Forest plot of the** **associations between the predictors and elevated serum uric acid levels according to multivariate logistic regression analysis in the female cohort**


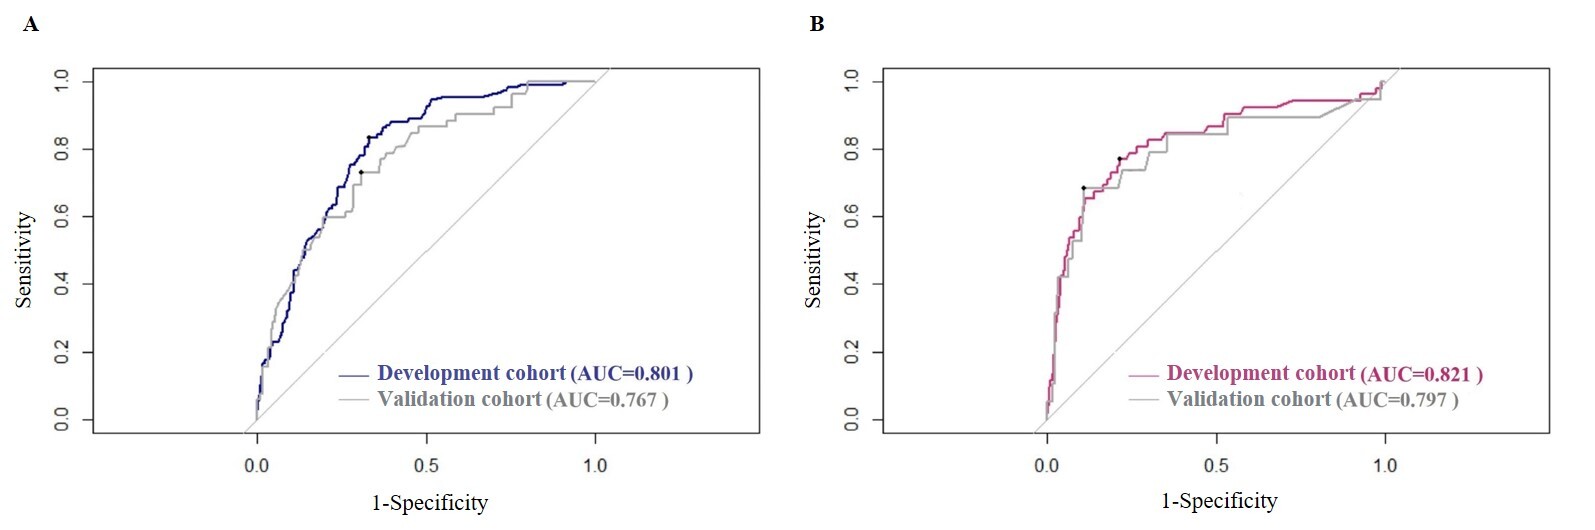


**Supplementary Figure 2A. Receiver operating characteristic curve of the prediction performance of each algorithm in the male cohort**

**Supplementary Figure 2B. Receiver operating characteristic curve of the prediction performance of each algorithm in the female cohort**
